# Supplementary material
Source: Springer Nature journal article supplement (https://www.springermedizin.de/resource/supplementary/12877_2011_716_MOESM4_ESM.pdf/9440052)
Supplement: MOESM4 [file 9440052]

Identification

Records identified through database searching (n =95)

Additional records identified through other sources (n =0)

Screening

Records after duplicates removed (n = 71)

Records screened (n =71)

Records excluded (n = 51), with reasons  
(Did not refer to postural control or used electrical vibration stimuli)

Eligibility

Full-text articles assessed for eligibility (n = 20)

Full-text articles excluded, with reasons  
(n = 5; did not refer to postural control or used electrical vibration stimuli)

Studies included in qualitative synthesis (n = 15)

Included

Studies included in quantitative synthesis & meta-analysis (n =15)

From: Moher D, Liberati A, Tetzlaff J, Altman DG, The PRISMA Group (2009). Preferred Reporting Items for Systematic Reviews and Meta-Analyses: The PRISMA Statement. PLoS Med 6(6): e1000097. doi:10.1371/journal.pmed1000097
